# Supplementary material
Source: PubMed Central journal article supplement (PMC6395549)

**A**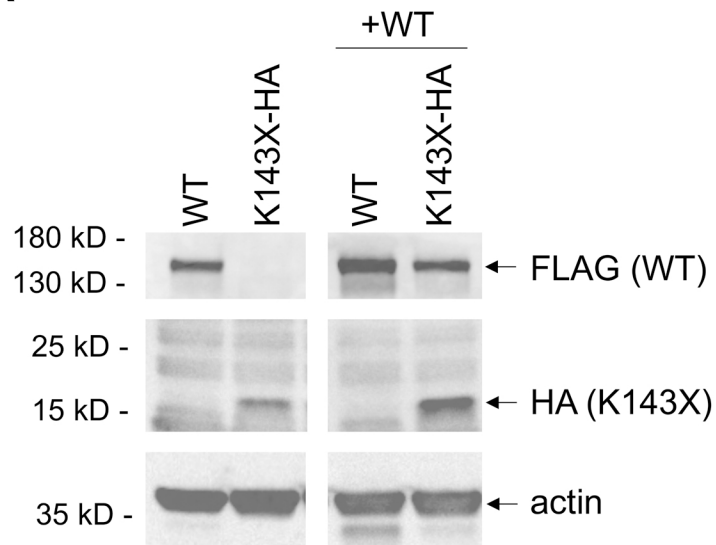**B**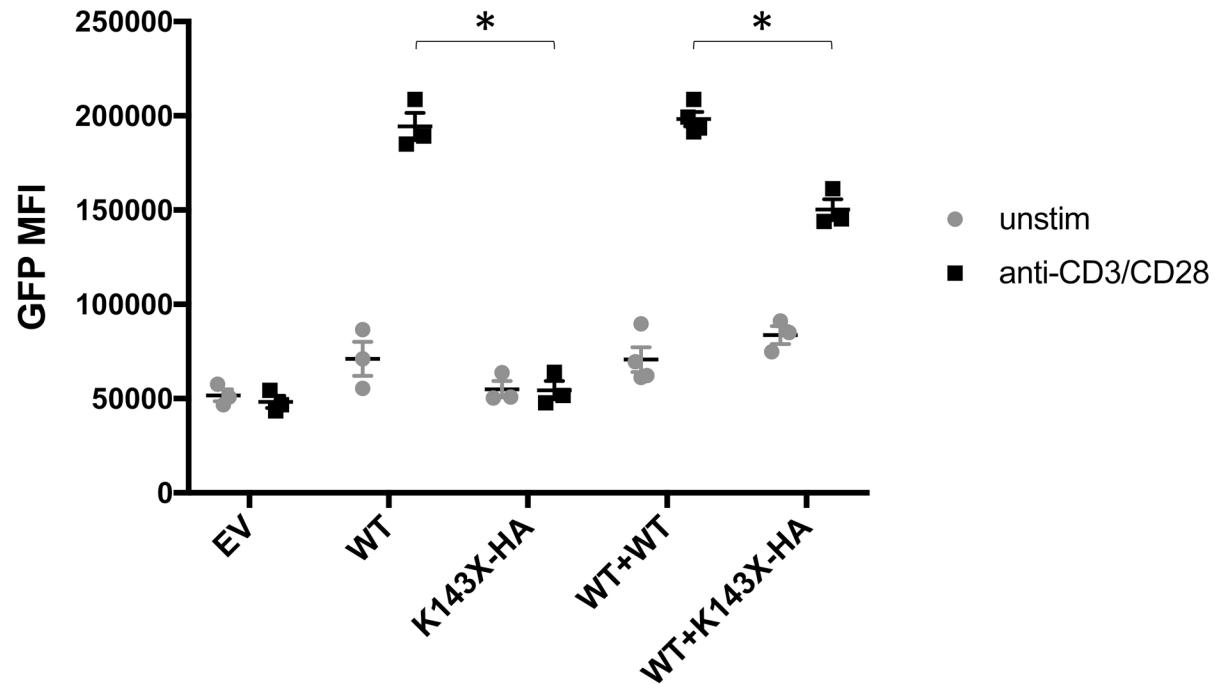

Supplement: NIHMS1505504-supplement-1.pdf [file NIHMS1505504-supplement-1.pdf]

A

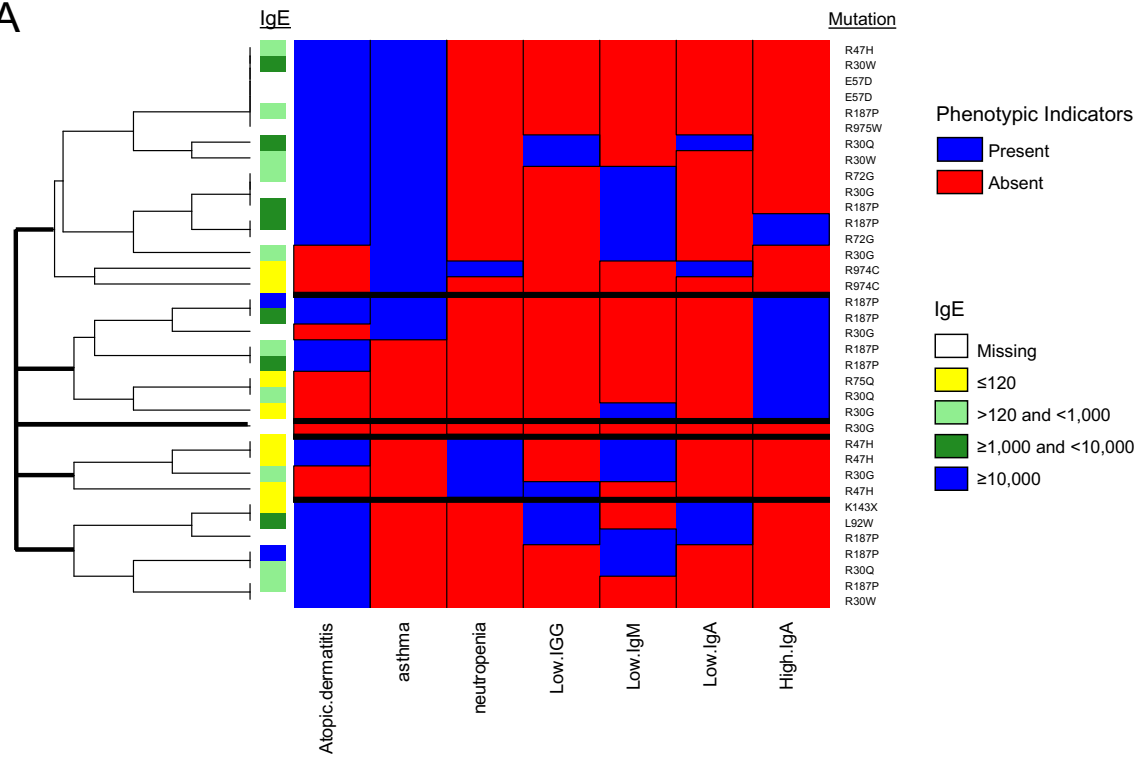

B

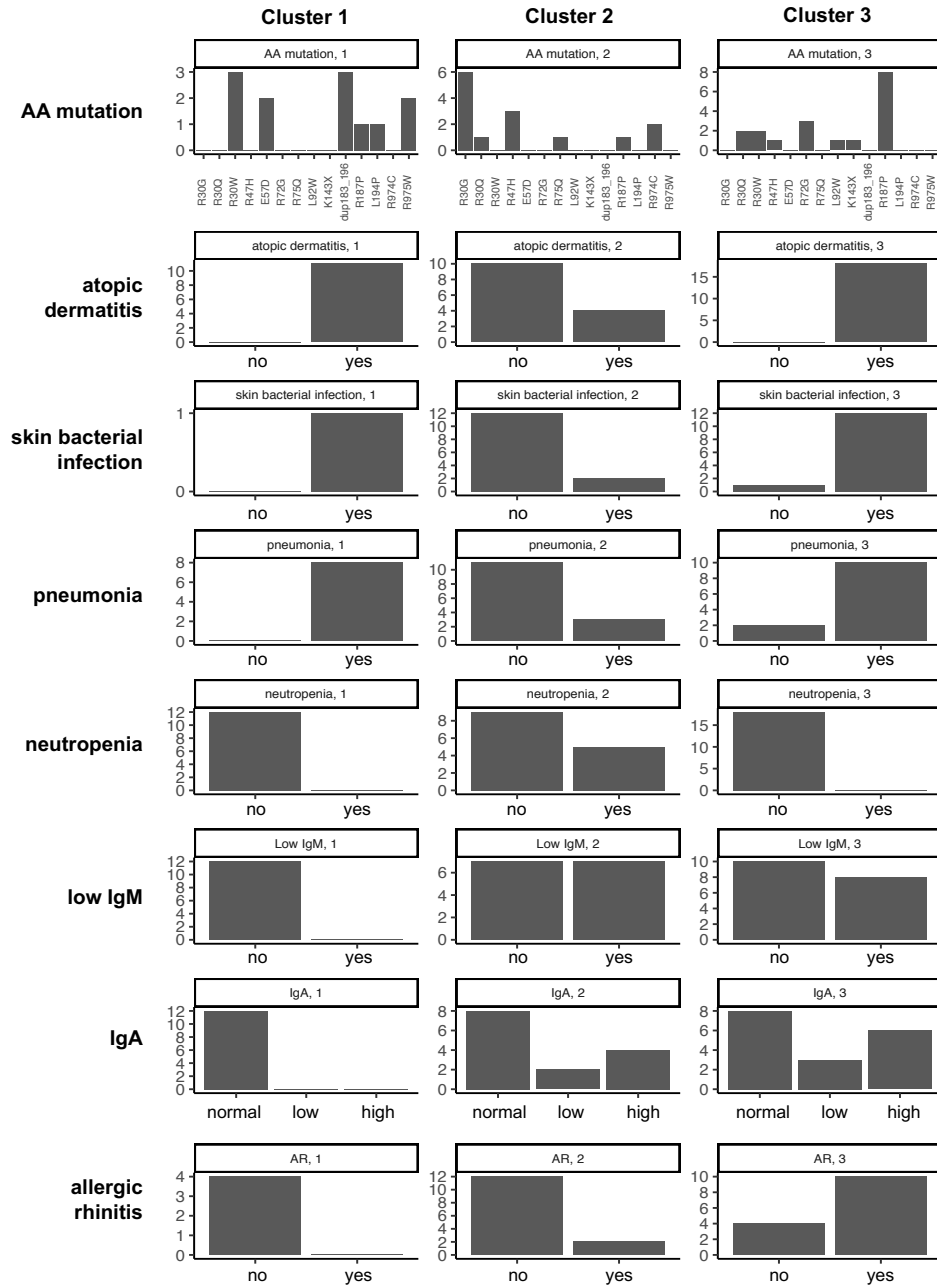

Supplement: NIHMS1505504-supplement-2.pdf [file NIHMS1505504-supplement-2.pdf]

**A**

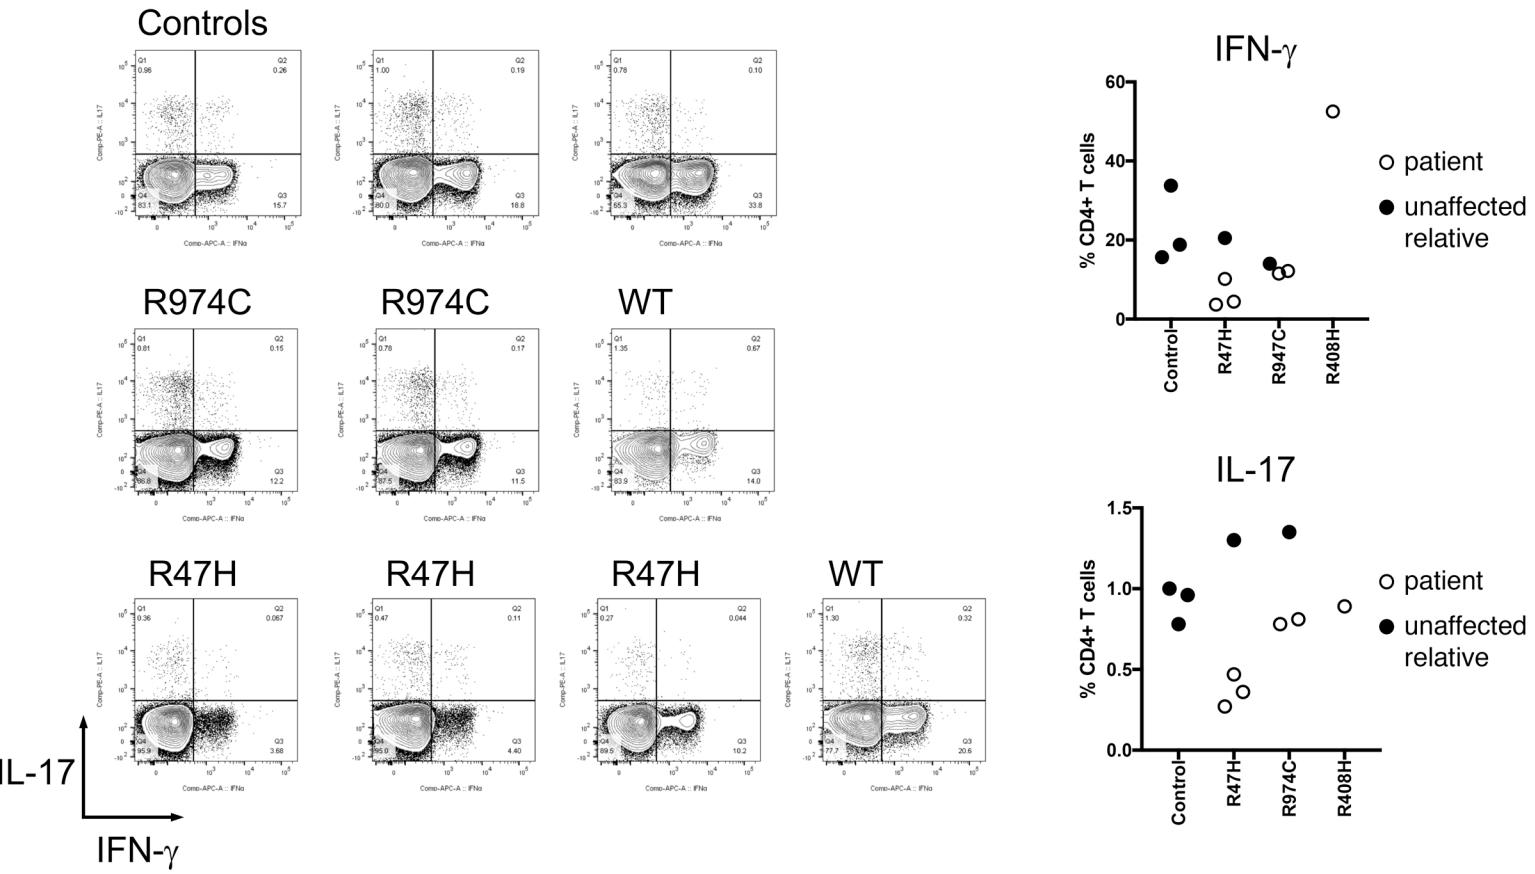

**B**

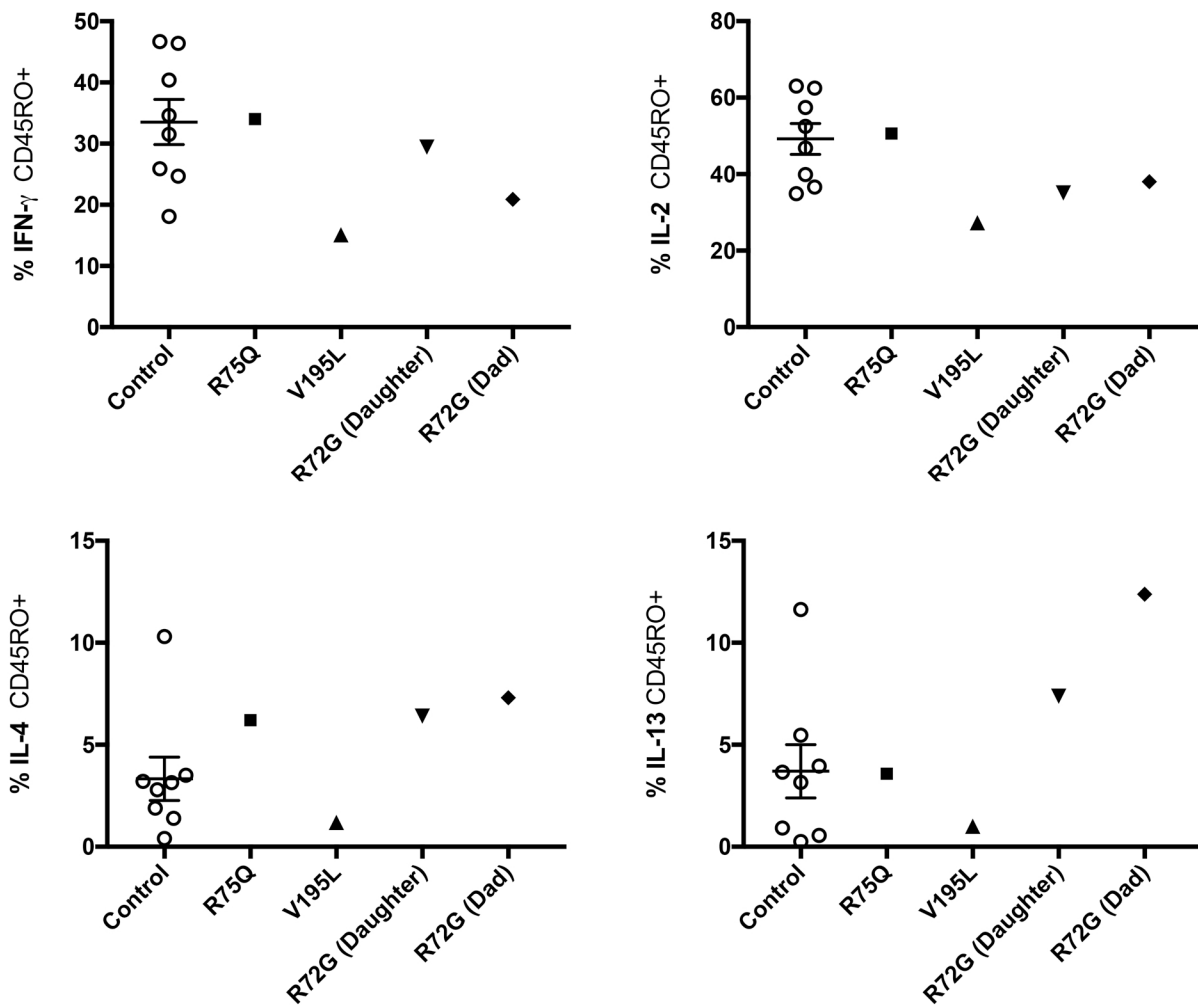

Supplement: NIHMS1505504-supplement-3.pdf [file NIHMS1505504-supplement-3.pdf]

CD69

CD25

CD98

CD45RO+

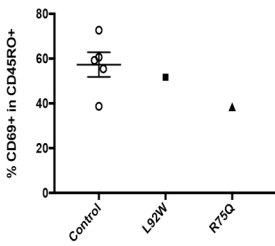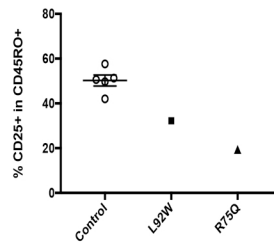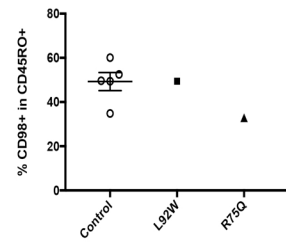

CD45RO-

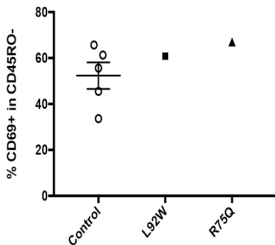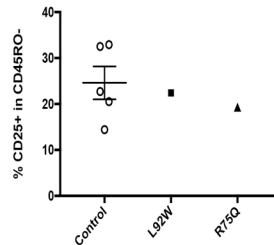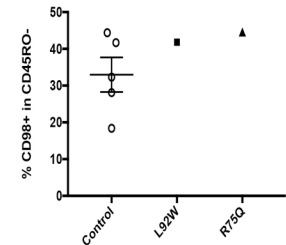

L92W and R75Q

CD69

CD25

CD98

CD45RO+

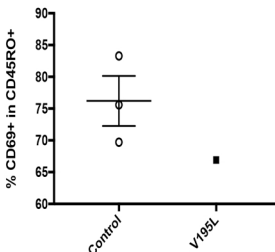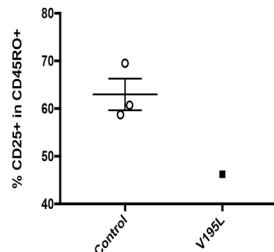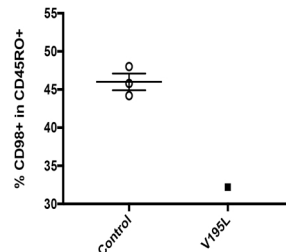

CD45RO-

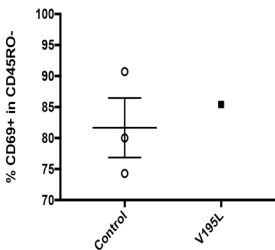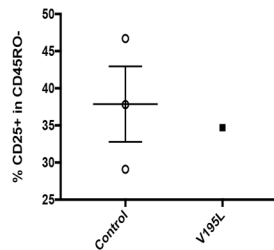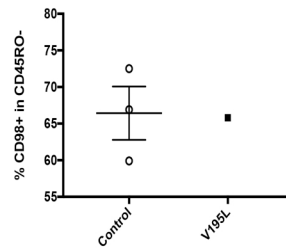

V195L

CD69

CD25

CD98

CD45RO+

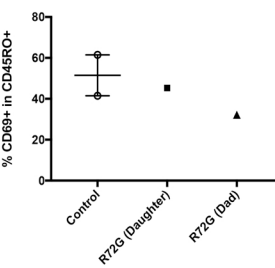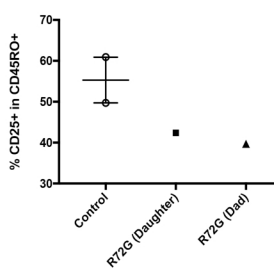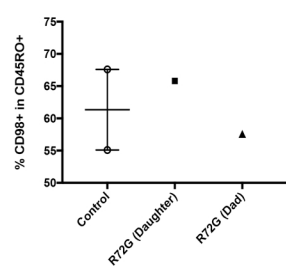

CD45RO-

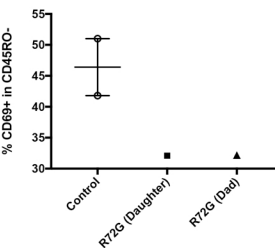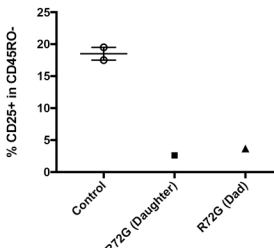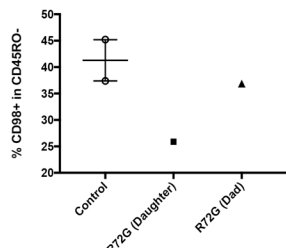

R72G

Supplement: NIHMS1505504-supplement-4.pdf [file NIHMS1505504-supplement-4.pdf]
